# Supplementary material
Source: publisher figshare collection journal article supplement (https://acs.figshare.com/ndownloader/files/5166904)
Supplement: Supplementary file 1 [file 5166904]

## Supplementary Material

In the refinement of the structure of compounds **2** and **4** the  $\text{MeNH}_3^+$  and  $\text{EtNH}_3^+$  cations and water molecules were located on a  $\Delta F$  map but their atoms have a very large thermal motion because of the disorder. For this reason the atomic coordinates and the isotropic displacement parameters of the  $\text{MeNH}_3^+$  cation and water molecule in **2** and the carbon atoms of the  $\text{EtNH}_3^+$  cation in **4** were not refined.

The residual agreement factors for reflections with  $I > 2\sigma(I)$  for **2** and **4** respectively are  $R1 = 0.0611$ ,  $wR2 = 0.1582$ , and  $R1 = 0.0297$ ,  $wR2 = 0.0844$ .

In the refinement of the structure of compound **3** was not possible to find a reasonable model for the disordered  $\text{Me}_2\text{NH}_2^+$  and solvent. The contribution of the disordered cations to the diffraction pattern (16 molecules located in the voids of the channels of the lattice that amount to 43.7% of the unit cell) were subtracted from the observed data by the "SQUEEZE" method as implemented in PLATON (A. L. Spek, *Acta Cryst.*, **1990**, A46, C34 and P. Van der Sluis, A. L. Spek, *Acta Cryst.*, **1990**, A46, 194: The SQUEEZE-Bypass method referred therein is widely used in crystallographic analysis of compounds containing substantial amounts of disordered solvent/counterions that can not be located precisely from diffraction data.)

The residual agreement factors for reflections with  $I > 2\sigma(I)$  before SQUEEZE are  $R1 = 0.1067$ ,  $wR2 = 0.2524$ , and after  $R1 = 0.0767$ ,  $wR2 = 0.1750$ .

The final formulation of the compound is in agreement with the residual electron density and volume.

Testing the two enantiomeric models of the crystal **2**, **3** and **4** with a final refined Flack parameter of 0.46(5), 0.45(9), and 0.46(2) respectively, shows that the handedness was not uniquely determined.
